# Supplementary material for: First-principles studies of proton-Ba interactions in doped LaPO4
Source: Royal Society of Chemistry journal article supplement (doi:10.1039/c2jm16214h), 2012-01-01
Supplement: c2jm16214h.pdf [file c2jm16214h.pdf]

## Supplementary Information

While the decreased binding energy of site 1 could be due to the shorter O-O distance (despite almost no increase in the hydrogen bond length), this analysis does not hold for sites 2-4. Thus, distortion of bonds besides the hydroxyl and hydrogen bonds must be considered. Figure SI 1 shows that each proton site's hydrogen-bond length is closely correlated with the distance between the two oxygen involved in hydroxyl and hydrogen bonds with the proton.

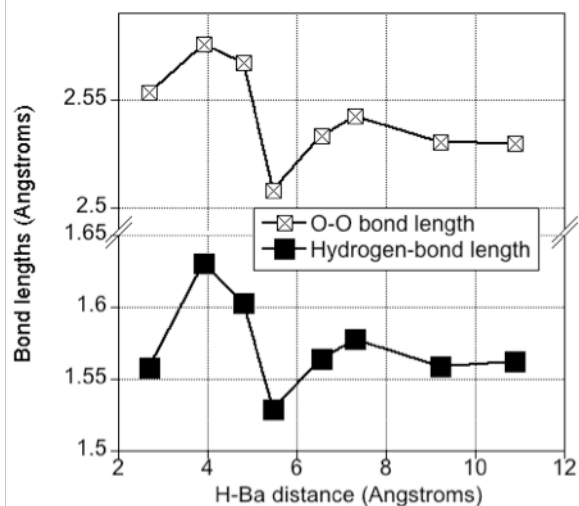

Figure SI 1: The O-O bond length correlates well with the hydrogen-bond length, except for site 1. The proton draws the two closest oxygen towards itself, decreasing the hydrogen bond and the O-O distance.

Table SI 1: The proton stabilization and environment, as described by the hydroxyl and hydrogen bond lengths and the hydroxyl-oxygen hydrogen-oxygen bond lengths (O-O), are given for each site. The effect of the proton on the average Ba-O bond length is given in the last column. The last row (0) gives bond lengths without the Ba-dopant and the average La-O bonds.

| H+ site | $\Delta$ Energy (eV) | Hydroxyl bond | Hydrogen bond | O-O bond |
|---------|----------------------|---------------|---------------|----------|
| 1       | -0.202               | 1.035         | 1.558         | 2.553    |
| 2       | 0.049                | 1.025         | 1.630         | 2.576    |
| 3       | 0.003                | 1.027         | 1.603         | 2.567    |
| 4       | -0.042               | 1.041         | 1.528         | 2.508    |
| 5       | -0.016               | 1.034         | 1.564         | 2.533    |
| 6       | 0.015                | 1.030         | 1.577         | 2.542    |
| 7       | -0.010               | 1.035         | 1.559         | 2.530    |
| 8       | 0                    | 1.033         | 1.562         | 2.529    |
| 0       |                      | 1.03          | 1.56          | 2.5      |
